# Supplementary material for: The Hepatitis E virus intraviral interactome
Source: PubMed Central journal article supplement (PMC4604457; doi:10.1038/srep13872), 2015-10-14
Supplement: srep13872-s1.pdf [file srep13872-s1.pdf]

## The Hepatitis E virus intraviral interactome

*Andreas Osterman<sup>1,§</sup>; Thorsten Stellberger<sup>2,3,§</sup>; Anna Gebhardt<sup>1,†</sup>; Marisa Kurz<sup>1</sup>; Caroline C. Friedel<sup>4</sup>; Peter Uetz<sup>2,5</sup>; Hans Nitschko<sup>1</sup>; Armin Baiker<sup>3</sup>; Maria G. Vizoso-Pinto<sup>1,6\*</sup>*

**Supplementary Table 1. Overview of vectors used for drawing the HEV Interactome**

| Construct ID | Position (aa) in the respective ORFp | Description                          | Gateway entry clone | Y2H Expression vectors (N- and C-terminal fusions)     | LUMPIs expression vectors    |
|--------------|--------------------------------------|--------------------------------------|---------------------|--------------------------------------------------------|------------------------------|
| Met          | 56-237                               | Methyl-transferase                   | pENTR207-Met        | pGBKT7g-Met<br>pGADT7g-Met<br>pGBKCG-Met<br>pGADCG-Met | pCR3.1NMBP<br>pCR3.1NeGFPluc |
| Y            | 216-432                              | Y domain                             | pENTR207-Y          | pGBKT7g-Y<br>pGADT7g-Y<br>pGBKCG-Y<br>pGADCG-Y         | pCR3.1NMBP<br>pCR3.1NeGFPluc |
| Plp          | 433-592                              | Papain-like cysteine protease        | pENTR207-Plp        | pGBKT7g-Plp<br>pGADT7g-Plp<br>pGBKCG-Plp<br>pGADCG-Plp | pCR3.1NMBP<br>pCR3.1NeGFPluc |
| V            | 712-778                              | Hyper-variable region                | pENTR207-V          | pGBKT7g-V<br>pGADT7g-V<br>pGBKCG-V<br>pGADCG-V         | pCR3.1NMBP<br>pCR3.1NeGFPluc |
| X            | 785-942                              | X domain                             | pENTR207-X          | pGBKT7g-X<br>pGADT7g-X<br>pGBKCG-X<br>pGADCG-X         | pCR3.1NMBP<br>pCR3.1NeGFPluc |
| Pvx          | 433-942                              | Putative functional protease complex | pENTR207-Pvx        | pGBKT7g-Pvx<br>pGADT7g-Pvx<br>pGBKCG-Pvx<br>pGADCG-Pvx | pCR3.1NMBP<br>pCR3.1NeGFPluc |
| Hel          | 960-1204                             | Helicase domain                      | pENTR207-Hel        | pGBKT7g-Hel<br>pGADT7g-Hel<br>pGBKCG-Hel<br>pGADCG-Hel | pCR3.1NMBP<br>pCR3.1NeGFPluc |

|         |           |                              |                  |                                                                        |                              |
|---------|-----------|------------------------------|------------------|------------------------------------------------------------------------|------------------------------|
| RdRp    | 1207-1695 | RNA dependent RNA polymerase | pENTR207-RdRp    | pGBKT7g-RdRp<br>pGADT7g-RdRp<br>pGBKCg-RdRp<br>pGADCg-RdRp             | pCR3.1NMBP<br>pCR3.1NeGFPluc |
| O3      | 1-123     | ORF 3                        | pENTR207-O3      | pGBKT7g-O3<br>pGADT7g-O3<br>pGBKCg-O3<br>pGADCg-O3                     | pCR3.1NMBP<br>pCR3.1NeGFPluc |
| O2      | 1-660     | ORF 2                        | pENTR207-O2      | pGBKT7g-O2<br>pGADT7g-O2<br>pGBKCg-O2<br>pGADCg-O2                     | pCR3.1NMBP<br>pCR3.1NeGFPluc |
| O2_FLd  | 112-608   | ORF2 <sup>112-608</sup>      | pENTR207-O2_FLd  | pGBKT7g-O2_FLd<br>pGADT7g-O2_FLd<br>pGBKCg-O2_FLd<br>pGADCg-O2_FLd     |                              |
| O2_S    | 118-313   | ORF2 S domain                | pENTR207-O2_S    | pGBKT7g-S<br>pGADT7g-S<br>pGBKCg-S<br>pGADCg-S                         |                              |
| O2_P1   | 314-453   | ORF2 P1 domain               | pENTR207-O2_P1   | pGBKT7g-P1<br>pGADT7g-P1<br>pGBKCg-P1<br>pGADCg-P1                     |                              |
| O2_SP1  | 118-453   | ORF2 S and P1 domain         | pENTR207-O2_SP1  | pGBKT7g-SP1<br>pGADT7g-SP1<br>pGBKCg-SP1<br>pGADCg-SP1                 |                              |
| O2_P2   | 454-661   | ORF2 P2 domain               | pENTR207-O2_P2   | pGBKT7g-O2_P2<br>pGADT7g-O2_P2<br>pGBKCg-O2_P2<br>pGADCg-O2_P2         |                              |
| O2_P1P2 | 314-661   | ORF2 P1 and P2 domain        | pENTR207-O2_P1P2 | pGBKT7g-O2_P1P2<br>pGADT7g-O2_P1P2<br>pGBKCg-O2_P1P2<br>pGADCg-O2_P1P2 |                              |

---
